# Supplementary material for: Prognostic Impact of Elective Supraclavicular Nodal Irradiation for Patients with N1 Breast Cancer after Lumpectomy and Anthracycline Plus Taxane-Based Chemotherapy (KROG 1418): A Multicenter Case-Controlled Study
Source: PubMed Central journal article supplement — Cancer Res Treat. 2017 Jan 4;49(4):970–80. doi: 10.4143/crt.2016.382 (PMC5654147; doi:10.4143/crt.2016.382), 2017-01-04
Supplement: crt-2016-382-suppl1.pdf [file crt-2016-382-suppl1.pdf]

**S1 Table.** Prognostic factors for disease-free survival in 1,147 patients

| Characteristic                  | 5-Yr DFS (%) | p-value    |              | HR (95% CI)   |
|---------------------------------|--------------|------------|--------------|---------------|
|                                 |              | Univariate | Multivariate |               |
| Age (yr)                        |              |            |              |               |
| ≤ 40                            | 90.8         | 0.06       | -            |               |
| > 40                            | 93.5         |            |              |               |
| Tumor size (mm)                 |              |            |              |               |
| ≤ 20                            | 96.5         | < 0.01     | < 0.01       | 2.4 (1.5-3.9) |
| > 20                            | 89.3         |            |              |               |
| No. of tumor                    |              |            |              |               |
| Single                          | 93.0         | 0.69       | -            |               |
| Multiple                        | 92.7         |            |              |               |
| LVI                             |              |            |              |               |
| Negative                        | 96.6         | < 0.01     | < 0.01       | 2.0 (1.2-3.5) |
| Positive                        | 91.0         |            |              |               |
| HG                              |              |            |              |               |
| 1, 2                            | 96.2         | < 0.01     | < 0.01       | 2.6 (1.6-3.9) |
| 3                               | 87.9         |            |              |               |
| Molecular subtype               |              |            |              |               |
| Luminal A                       | 96.3         | < 0.01     | -            |               |
| Non-luminal A                   | 89.5         |            |              |               |
| No. of (+) node                 |              |            |              |               |
| 1, 2                            | 93.0         | 0.98       | -            |               |
| 3                               | 93.1         |            |              |               |
| Ratio of (+) node <sup>a)</sup> |              |            |              |               |
| ≤ 0.1                           | 94.7         | < 0.01     | < 0.01       | 1.8 (1.2-2.8) |
| > 0.1                           | 90.4         |            |              |               |
| Field of radiotherapy           |              |            |              |               |
| WBI                             | 93.1         | 0.79       | -            |               |
| WBI+SCNRT                       | 92.6         |            |              |               |

DFS, disease-free survival; HR, hazard ratio; CI, confidence interval; LVI, lymphovascular invasion; HG, histologic grade; WBI, whole breast irradiation; WBI+SCNRT, whole breast and supraclavicular lymph node irradiation. <sup>a)</sup> Ratio of positive lymph nodes to total dissected lymph nodes.
